# Supplementary material for: Structural basis of voltage-dependent gating in BK channels
Source: Springer Nature journal article supplement (doi:10.1038/s41467-025-60639-y), 2025-07-01
Supplement: MOESM1 [file 41467_2025_60639_MOESM1_ESM.pdf › 41467_2025_60639_MOESM1_ESM.pdf]

## Supplementary Information

### Supplementary Figure 1. Flow chart for the Cryo-EM data processing and structure determination for R1Q.

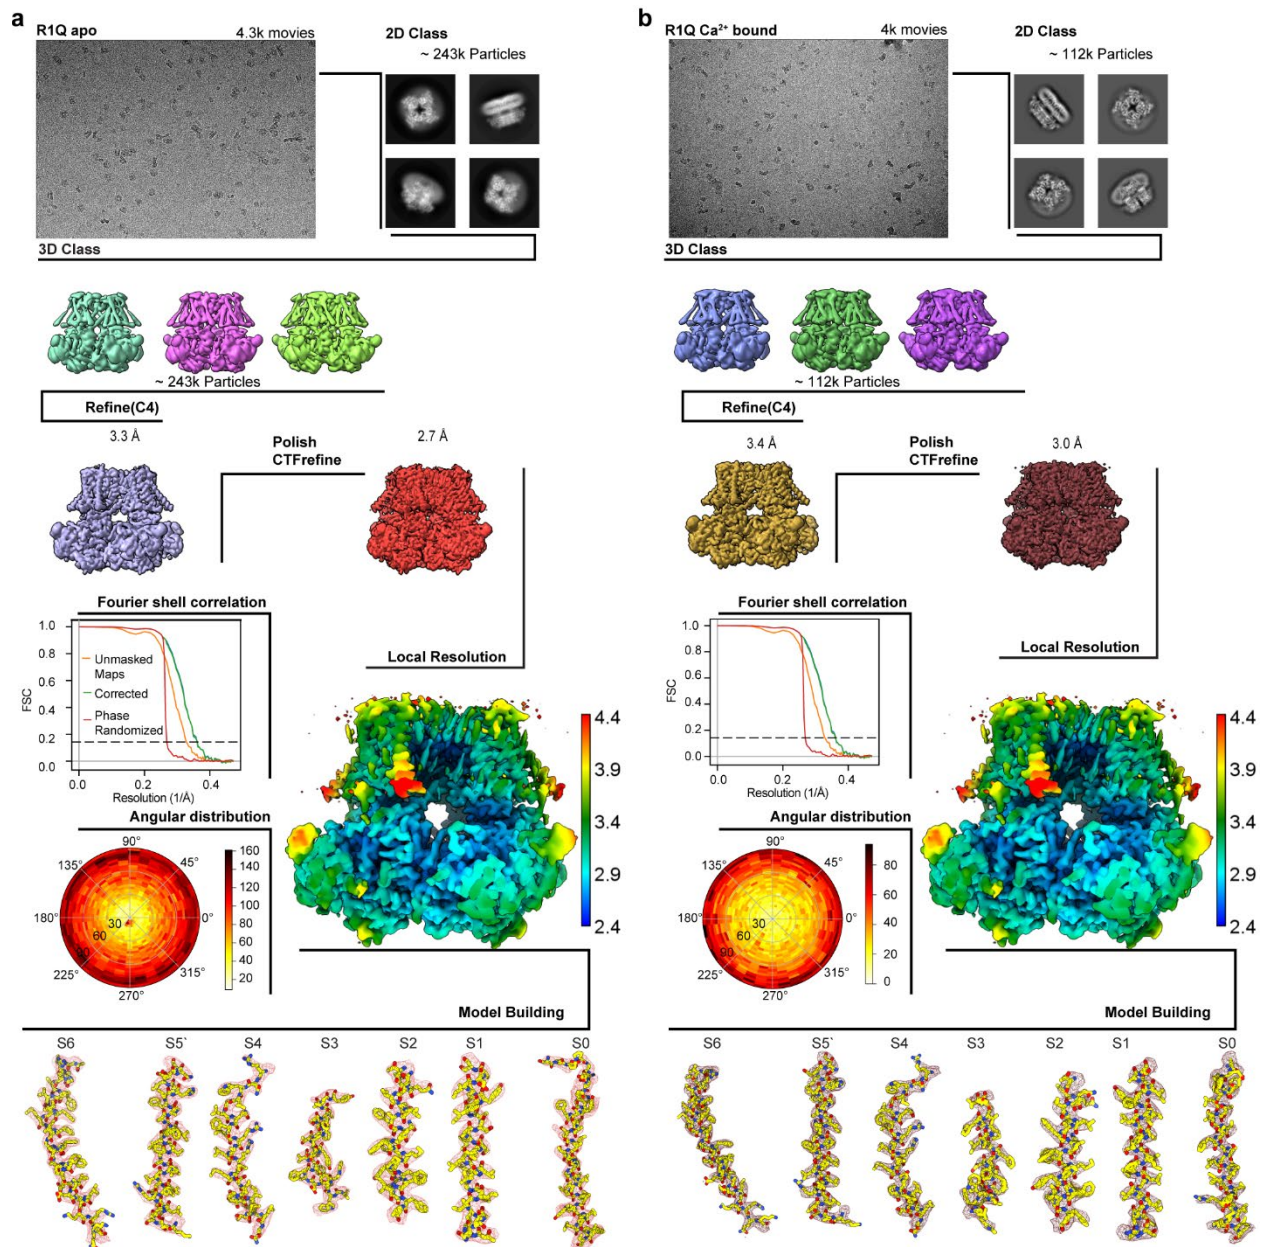

**a-b. Fourier shell correlation (FSC)** plot of the refined maps, with resolution determined using the FSC 0.143 criterion. **Angular distribution** plot for the refined full molecule is shown. **Local resolution** estimation is visualized using ResMap coloring on the unfiltered half map. **Model building** details are illustrated with representative segments of the sharpened cryo-EM density map overlaid with the fitted atomic model.

**Supplementary Figure 2. Flow chart for the Cryo-EM data processing and structure determination for R2Q.**

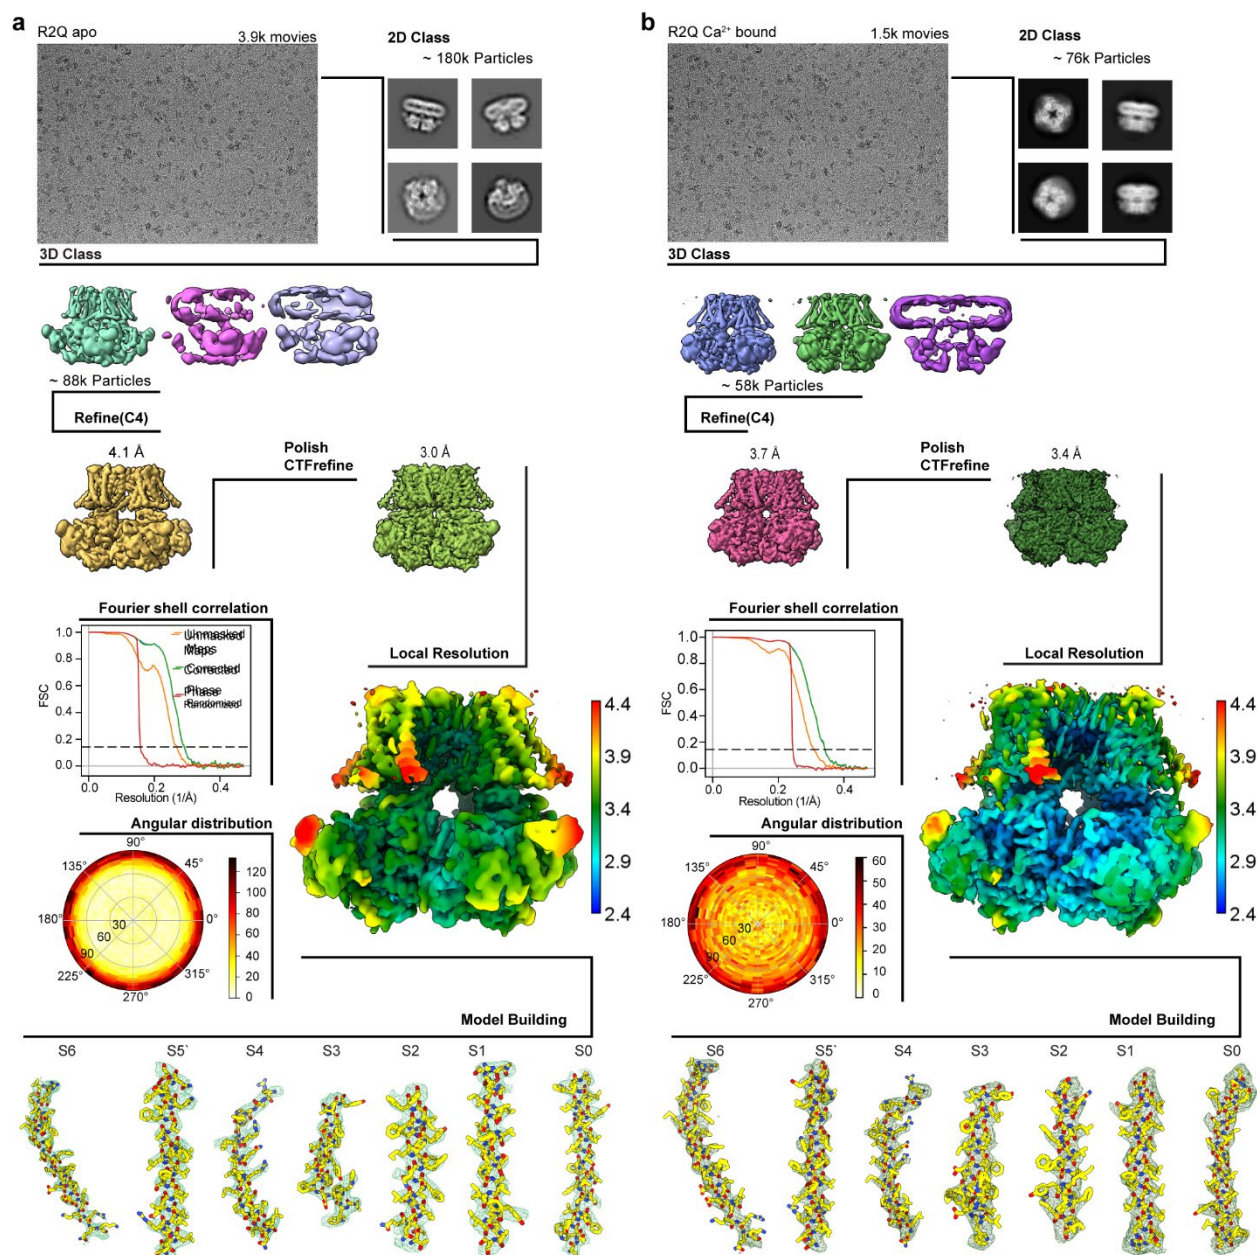

**a-b. Fourier shell correlation (FSC) plot of the refined maps, with resolution determined using the FSC 0.143 criterion. Angular distribution plot for the refined full molecule is shown. Local resolution estimation is visualized using ResMap coloring on the unfiltered half map. Model building details are illustrated with representative segments of the sharpened cryo-EM density map overlaid with the fitted atomic model.**



**Supplementary Figure 3. Flow chart for the Cryo-EM data processing and structure determination for R3Q.**

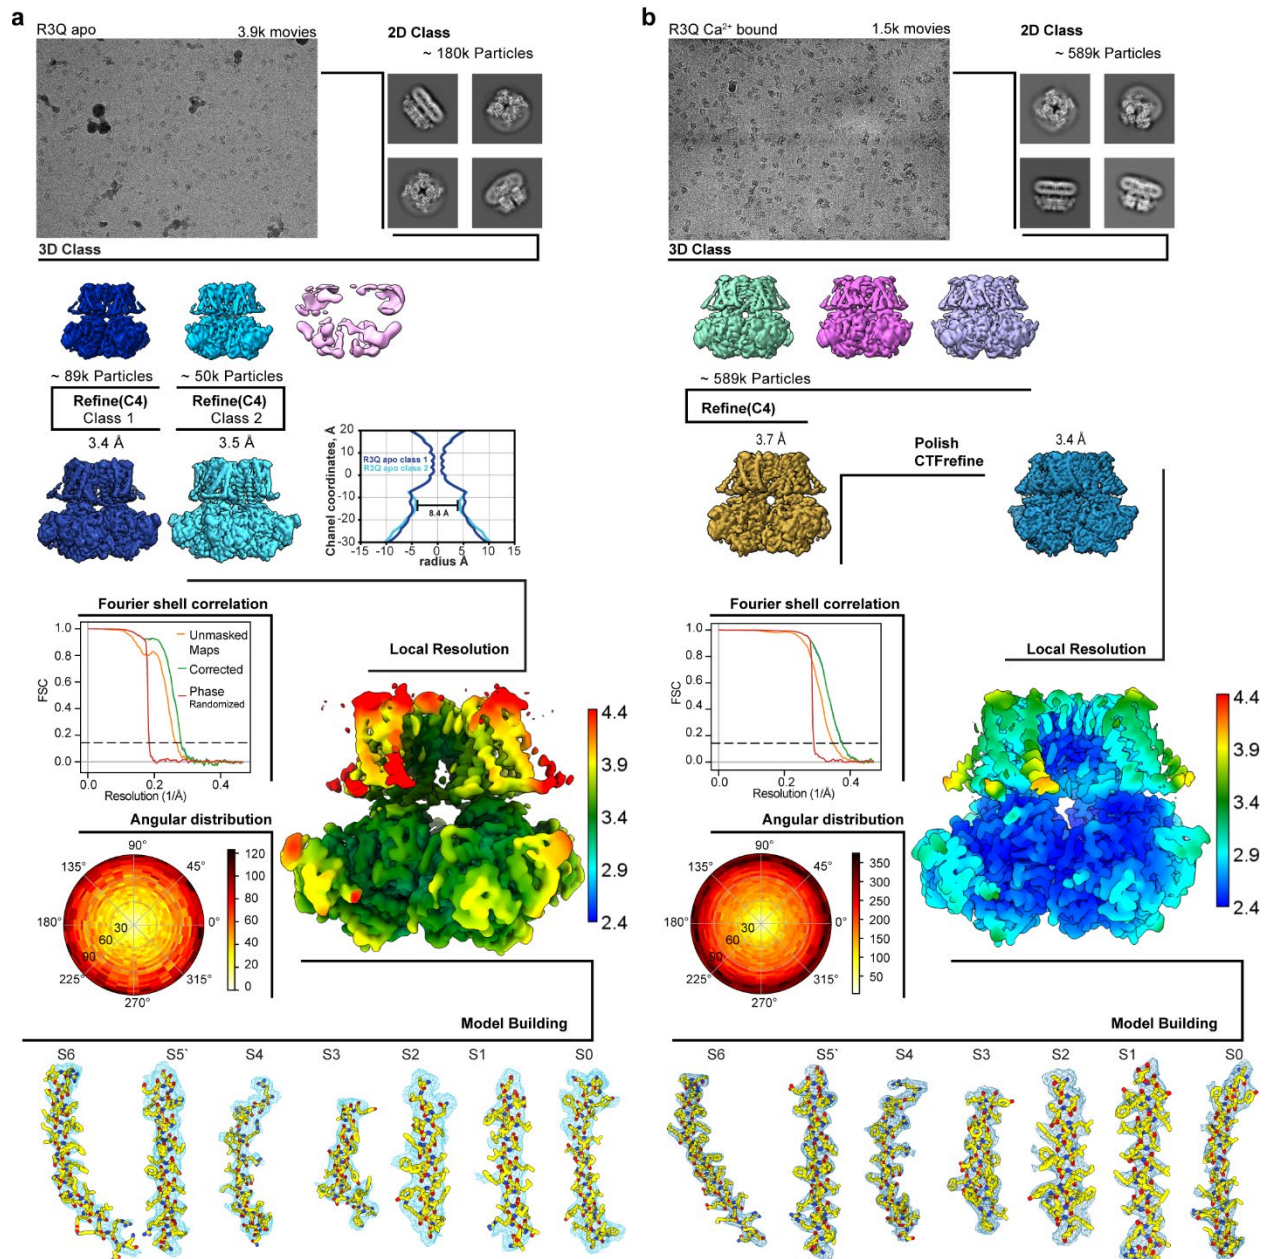

**a-b. Fourier shell correlation (FSC) plot of the refined maps, with resolution determined using the FSC 0.143 criterion. Angular distribution plot for the refined full molecule is shown. Local resolution estimation is visualized using ResMap coloring on the unfiltered half map. Model building details are illustrated with representative segments of the sharpened cryo-EM density map overlaid with the fitted atomic model.**

**Supplementary Figure 4. Flow chart for the Cryo-EM data processing and structure determination for F304A.**

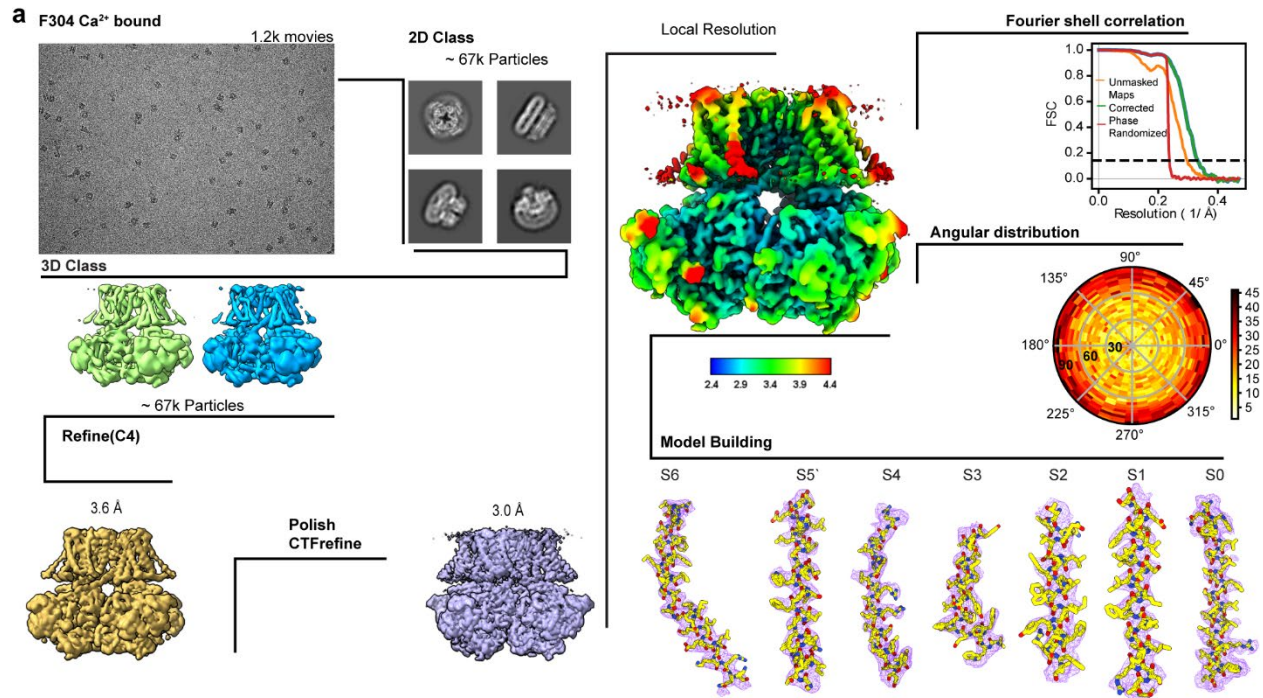

**a. Fourier shell correlation (FSC)** plot of the refined maps, with resolution determined using the FSC 0.143 criterion. **Angular distribution** plot for the refined full molecule is shown. **Local resolution** estimation is visualized using ResMap coloring on the unfiltered half map. **Model building** details are illustrated with representative segments of the sharpened cryo-EM density map overlaid with the fitted atomic model.

## Supplementary Figure 5. Intramolecular interactions in the VSD of aBK.

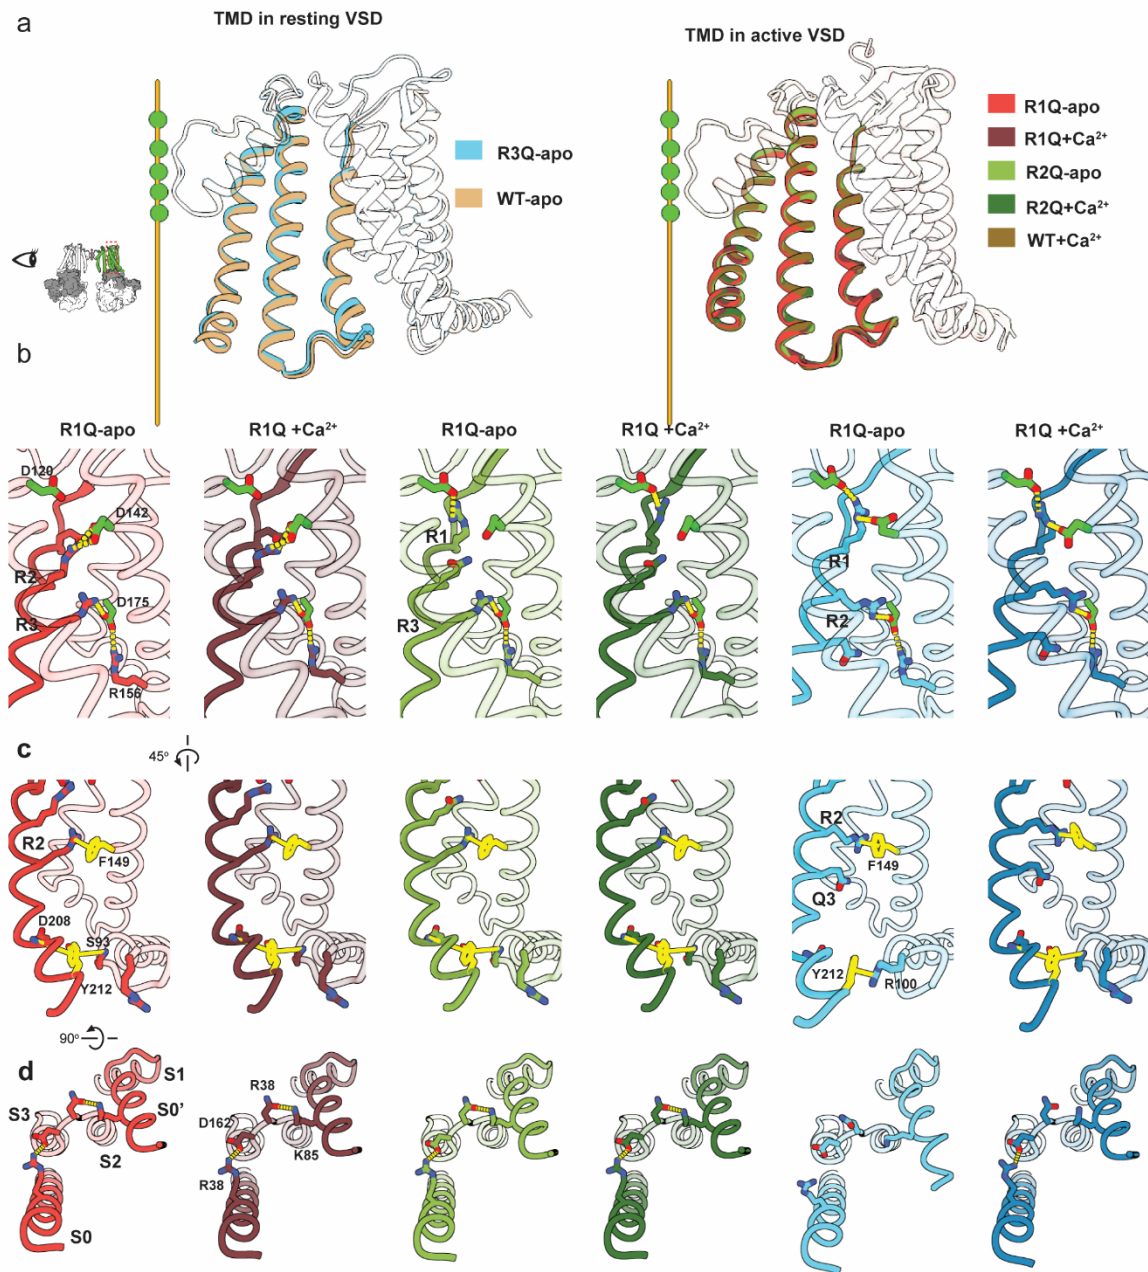

**a**, Schematic representation showing between the TMD of R3Q and WT apo, and open channel structures R1Q and R2Q with WT Ca<sup>2+</sup>-bound. **b**, side view of the charged residues of the VSD and the electrostatic interactions. **c**, side view of the charged residues of the VSD and their state dependent cation- $\pi$  (R2-F149, R3-F149 and R100-Y212) or amide- $\pi$  (D208-Y212-S93) interactions. **d**, bottom view of VSD.



**Supplementary Figure 6. Negative residues set an acidic environment in the VSD of BK.**

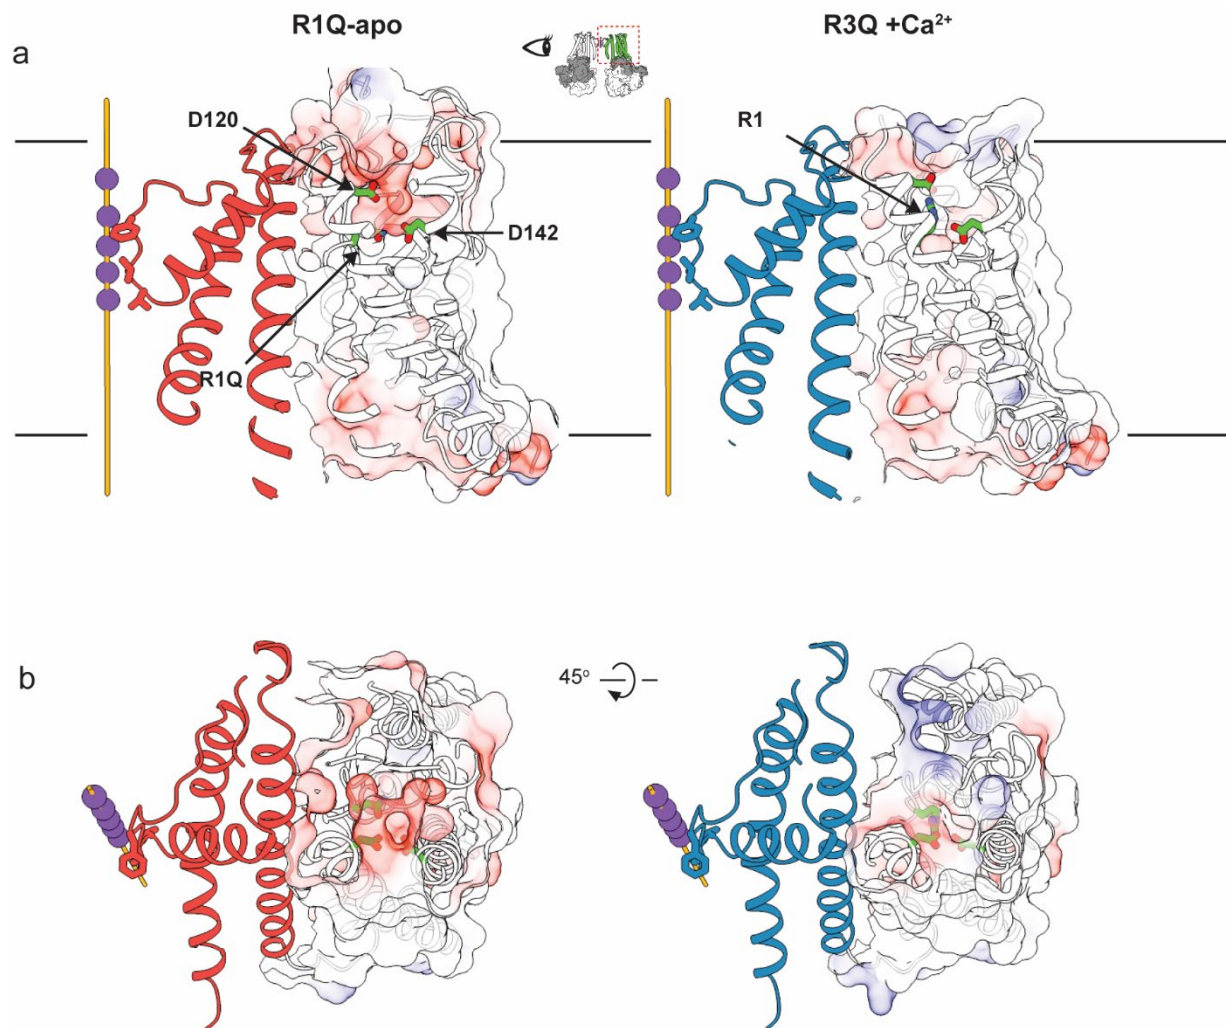

**a** and **b**, Electrostatic potential surfaces of the VSD (residues 1-218) of the R1Q-apo (*left*) and R3Q Ca<sup>2+</sup>-bound (*right*) structures. Key residues R1 (Q196 *left* and R196 *right*), D120, and D142 are shown as sticks.

## Supplementary Figure 7. New structural features in active VSD.

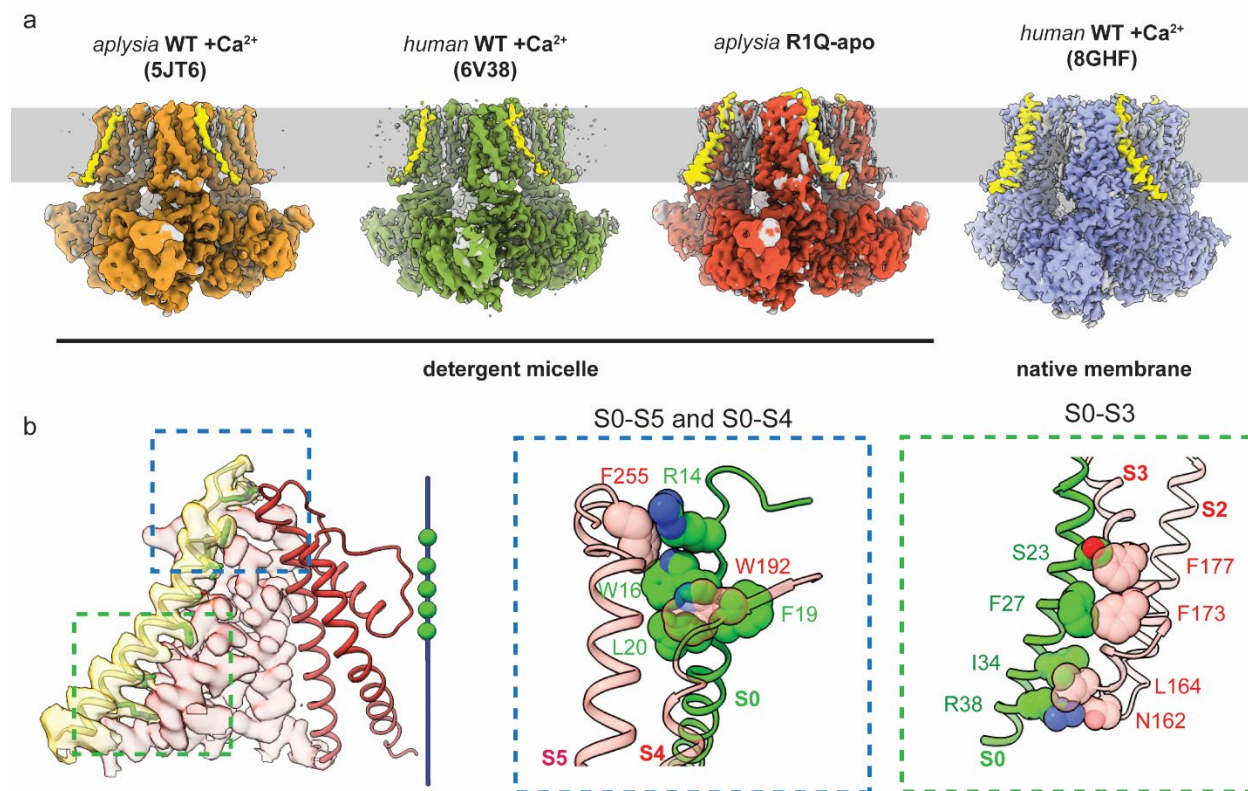

**a** Cryo-EM maps of BK structures with active VSD in detergent aBK-WT Ca<sup>2+</sup>-bound (orange PDB 5TJI), hBK-WT Ca<sup>2+</sup>-bound (green PDB 6V38), aBK-R1Q-apo (red), and native membranes hBK-WT Ca<sup>2+</sup>-bound (purple PDB 8GHF). Segment S0 is yellow. **b**, Composite cryo-EM map and structural model of R1Q-apo shown in ribbon representation; well-resolved residues in S0 are in close contact with the rest of the VSD. The extracellular side residues of S0, R14, W16, F19, and L20 (green spheres), are in steric contact with W196 in S4 and F255 in S5 (red spheres). In contrast, at the cytoplasmic end of S0, S23, F27, I34, and R38 (green sphere) interact with F177, F173, L164, and N162 (red) in S3.

# Supplementary Figure 8. VSD induces conformational changes in the CTD .

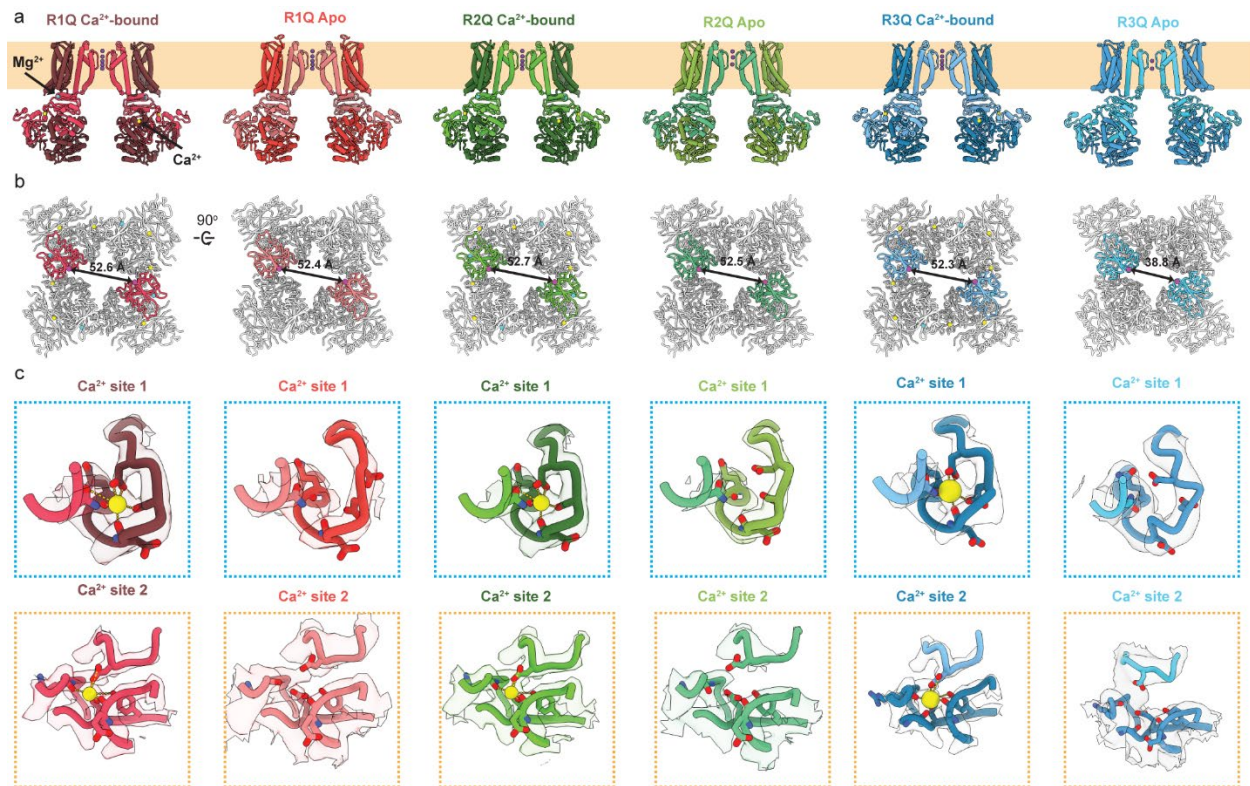

**a**, Side of the atomic models of R1Q-apo (red, *left*) and R1Q  $\text{Ca}^{2+}$ -bound (crimson, right); R2Q-apo (green light) and R2Q  $\text{Ca}^{2+}$ -bound (olive) (middle); R3Q-apo (light blue) and R3Q  $\text{Ca}^{2+}$ -bound (steel blue) (left). Calcium ions are colored yellow. **b**, top of the gating ring, for simplicity only two out of four for RCK1 domain were colored. **c**, Composite view of the Cryo-EM maps and atomic model focused on the two calcium-binding sites at the CTD.



**Supplementary Figure 9. Changes in hydrophobicity in aBK permeation pathway.**

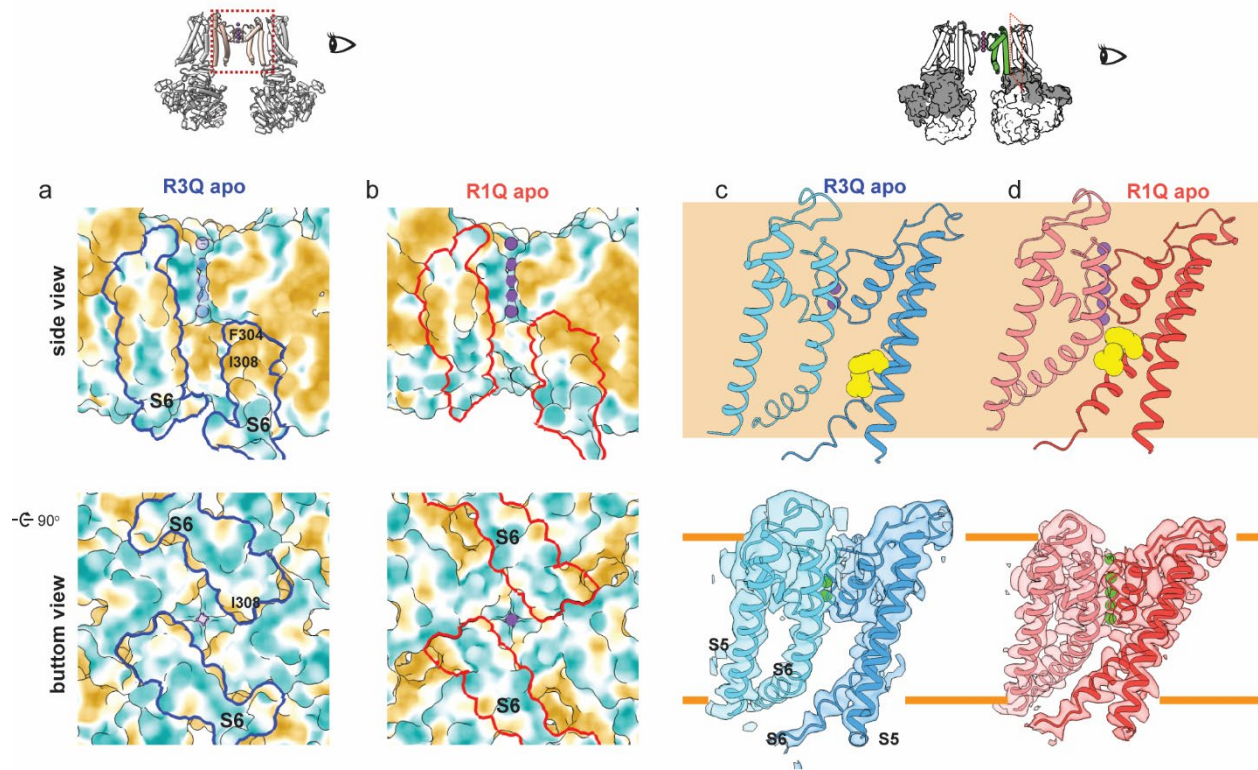

**a** and **b**, Side and top view of the ion permeation pathway of R3Q (left) and R1Q (right) in the apo condition solved in the presence of DDM, shown in surface representation where the surface is colored based on lipophilicity, from gold (lipophilic) to blue (hydrophilic). **c** and **d**, Peripheral side view of pore domain of two contiguous monomer, shown in cartoon representation including segments S4-S6, comparing the closed channel R3Q-apo (left light blue) with the open R1Q-apo (left red). The hydrophobic residues F304 and I308 are shown in the vdW representation.

# Supplementary Figure 10. bbTBA as geometrical constrain for BK permeation pathway.

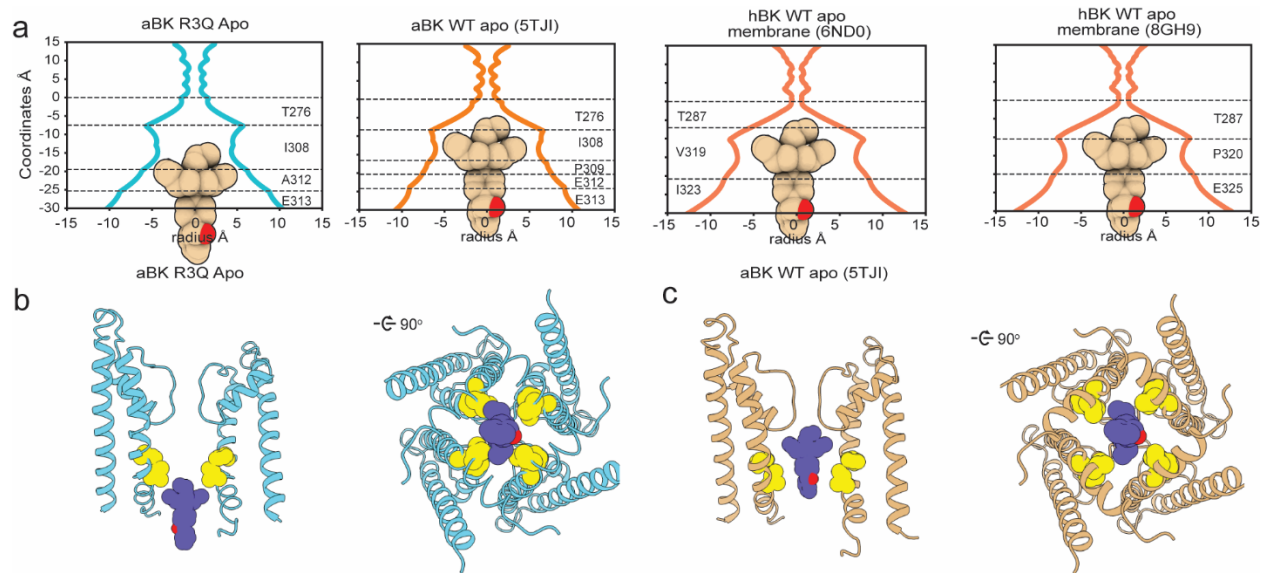

**a**, Comparison of the pore radius for aBK-WT apo (5TJI) solved in detergent, as well as hBK-apo (6ND0) and hBK apo (8GH9) in native membrane. **b**, Pore radius for metal free *aBK R3Q* structure. **c** and **d**, Side (left) and bottom(right) view of PGD including segments S4-S6 of aBK-WT apo (**c**, 5TJI) and R3Q-apo (**d**) overlay with the atomic model of bbTBA.

**Supplementary Figure 11. R3Q-apo unfolds the N-terminus of  $\alpha$ B/RCK1.**

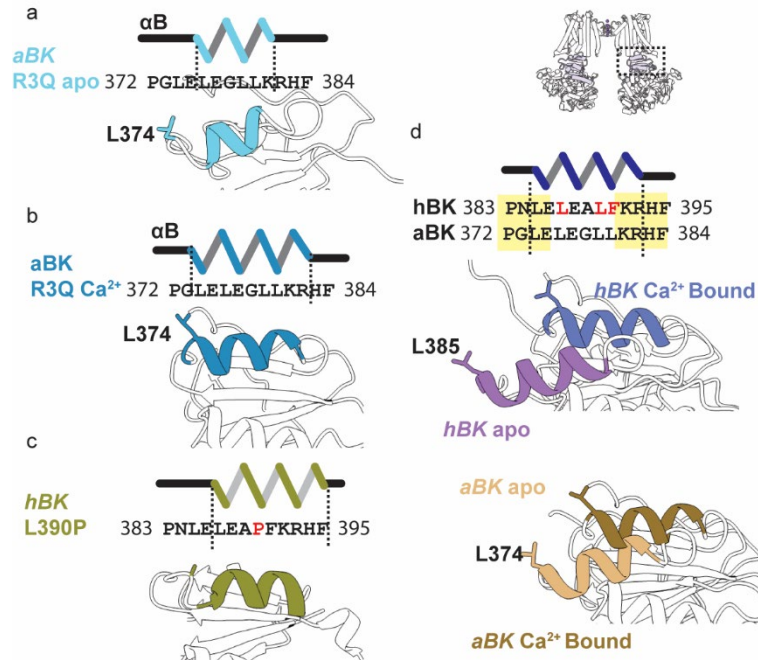

**a-c,** The structural comparison between the  $\alpha$ B helix in the CTD of both aBK (R3Q-apo and  $\text{Ca}^{2+}$ -bound) and hBK –L380P (PDB 6V5A). **d,** the  $\alpha$ B helix in the CTD of hBK under  $\text{Ca}^{2+}$ -bound conditions (PDB 6V38) and apo conditions (PDB 6V3G).



**Supplementary Figure 12. RCK1 rearrangement influences the structure of the resting VSD.**

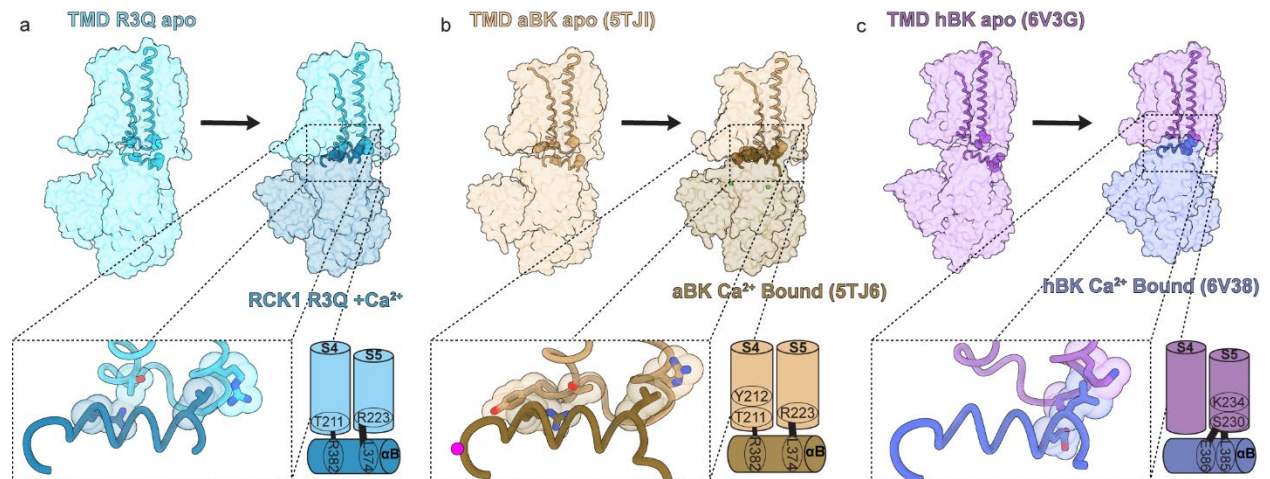

**a**, composite view of the TMD and the CTD of two contiguous monomers, of R3Q-apo (*top left*) followed the overlay of the CTD R3Q  $\text{Ca}^{2+}$ -bound (*top right*). The TMD's segment S4 and S5 shown in cartoon representation, as well as the  $\alpha\text{B}$  helix at CTD. The TMD and CTD are shown as a transparent surface. Key residues are display vdW representation. (*bottom left*) zoom of the interaction surface between the metal bound-CTD and the resting VSD. The residues producing clashes between are display in stick representation overlay with their vdW representation. (*bottom right*) schematic representation of the interacting residues an their secondary structure.

**b**, comparison between TMD of WT-apo (5TJI) and the CTD of WT  $\text{Ca}^{2+}$ -bound (5TJ6).

**c**, comparison between TMD of hBK-apo (6V3G) and hBK  $\text{Ca}^{2+}$ -bound (6V38).

**Supplementary Figure 13. VSD rearrangement influences the structure of the unbound gating ring.**

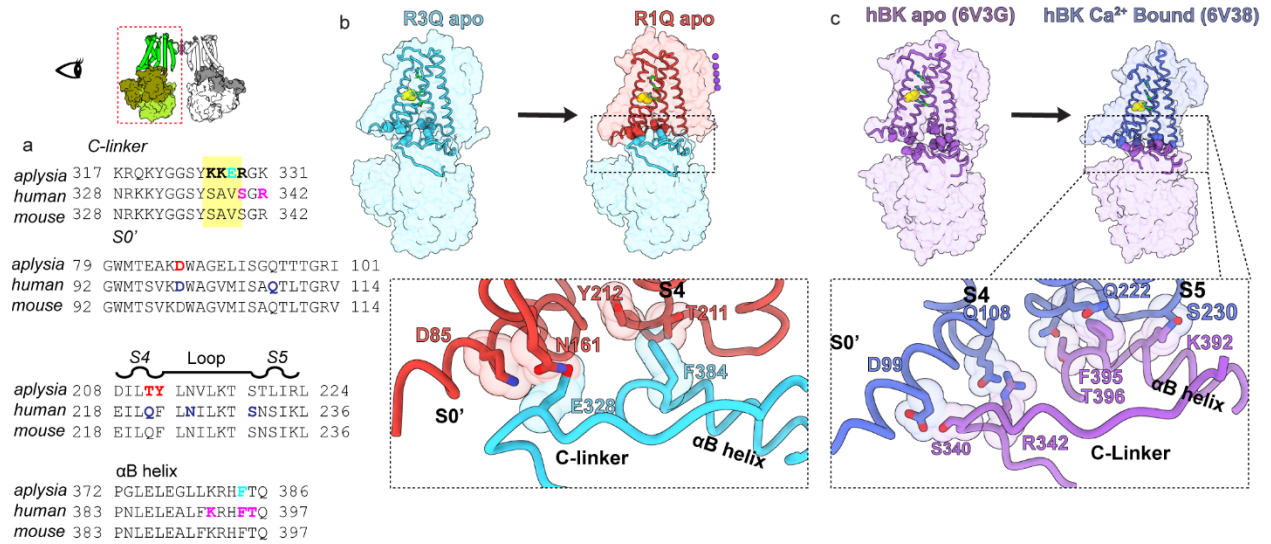

**a**, Sequence alignment of the secondary structures to be compared. **b** and **c**, structural comparison superimposing the structure of the active VSD of R1Q-apo with the CTD of R3Q apo (b), and the VSD of hBK Ca<sup>2+</sup>-bound (6V38) with the CTD of hBK-apo (6V3G).

**Supplementary Figure 14. Structural features of F304A Ca<sup>2+</sup>-bound.**

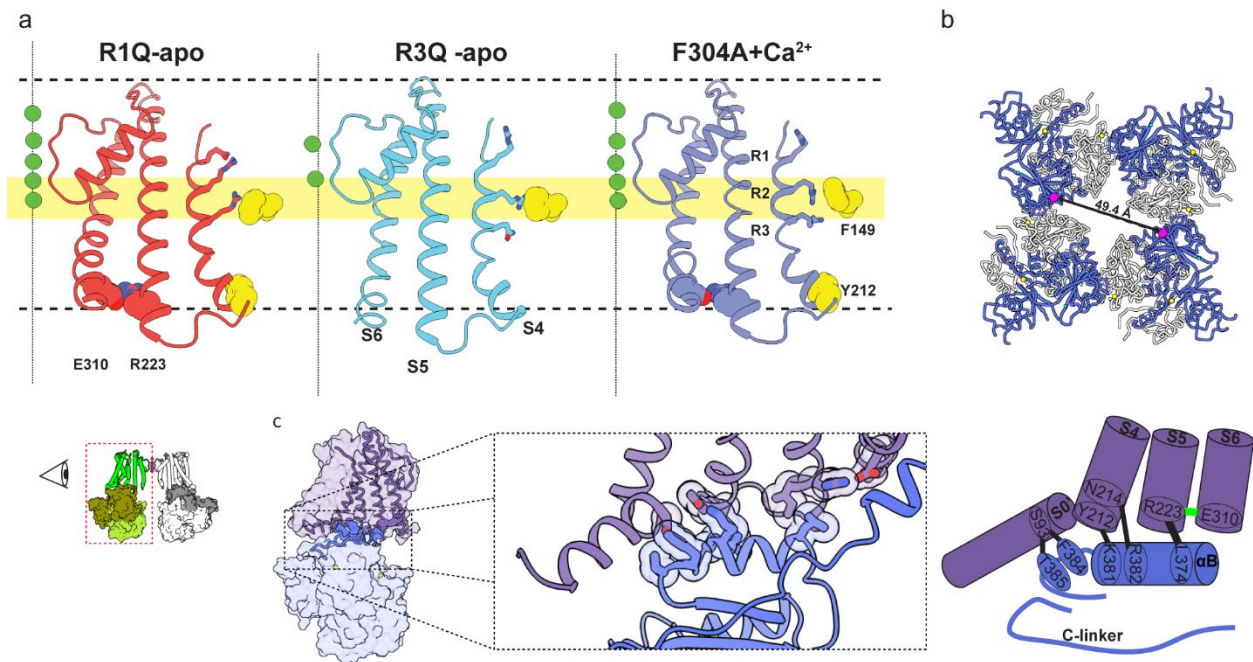

**a**, comparison of the position of S4 charged residues with respect to F149, for R1Q-apo, R3Q-apo, F304A Ca<sup>2+</sup>-bound. **b**, top view of the gating ring of F304A Ca<sup>2+</sup>-bound. **c**, composed view of two adjacent α-monomers. The TMD and RCK1 are represented in a cartoon and the structure of the whole monomer is overlay is represented as a transparent surface. (*middle*) zoom of the interaction surface between VSD-CTD, the key interacting residues are shown as stick representation superimposed with their transparent sphere representation. (*bottom*) scheme highlighting the key residues stabilizing the interaction between VSD-CTD.



**Supplementary Figure 15. Configuration of S6 affects the intersubunit coupling in the internal cavity of BK channels.**

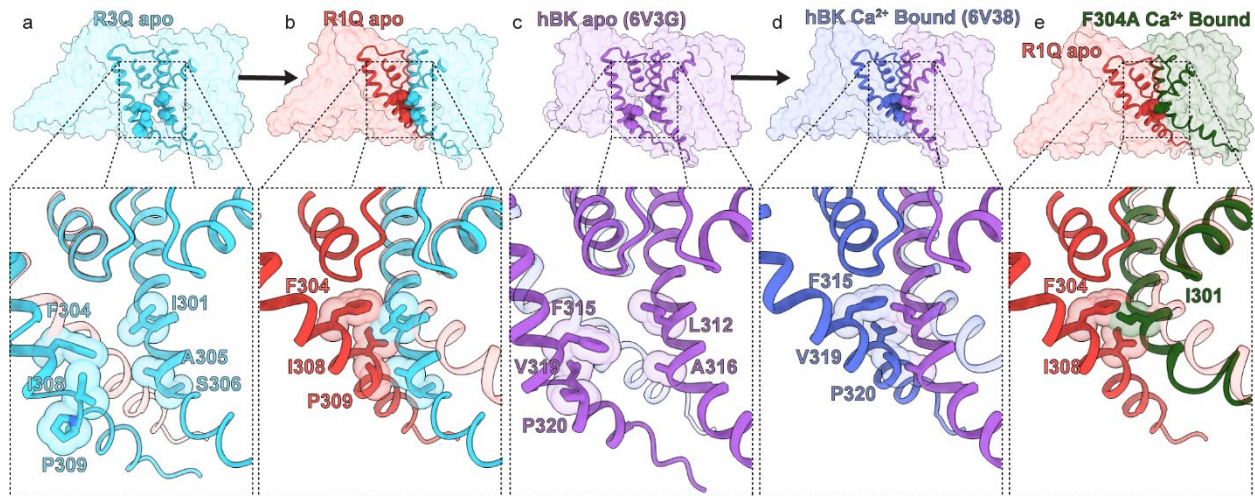

**a-e**, Composed view of two adjacent  $\alpha$ -monomers. The S6 helix of each monomer are illustrated in a cartoon and the structure of the whole monomer is shown as a transparent surface. (*top*) zoom of the interaction surface between the S6 adjacent  $\alpha$ -monomers, the key interacting residues are shown as stick representation superimposed with their transparent sphere representation.

**Supplementary Table 1. Cryo-EM data collection, refinement and validation statistics**

| Name                                  | R1Q                                |                         | R2Q       |                         | R3Q       |                         | F304A                   |
|---------------------------------------|------------------------------------|-------------------------|-----------|-------------------------|-----------|-------------------------|-------------------------|
| Mutation                              | R196Q                              |                         | R199Q     |                         | R202Q     |                         | F304A                   |
| Condition                             | Apo                                | Ca <sup>2+</sup> -bound | Apo       | Ca <sup>2+</sup> -bound | Apo       | Ca <sup>2+</sup> -bound | Ca <sup>2+</sup> -bound |
| PDB code                              | 9DIC                               | 9DI8                    | 9DJV      | 9DIT                    | 9DKN      | 9DKF                    | 9DKL                    |
| EMDB                                  | EMD-46903                          | EMD-46901               | EMD-46939 | EMD-46918               | EMD-46963 | EMD-46956               | EMD-46961               |
| <b>Data Collection</b>                |                                    |                         |           |                         |           |                         |                         |
| Microscope                            | Titan Krios 300 kV                 |                         |           |                         |           |                         |                         |
| Detector                              | K3 summit (Gatan)                  |                         |           |                         |           |                         |                         |
| Magnification                         | 81,000                             |                         |           |                         |           |                         |                         |
| Defocus Range                         | 0.5-2.2 (μm)                       |                         |           |                         |           |                         |                         |
| Total dose                            | 65 e <sup>-</sup> / Å <sup>2</sup> |                         |           |                         |           |                         |                         |
| Number of frames                      | 50                                 | 50                      | 50        | 50                      | 50        | 50                      | 50                      |
| Pixel size (Å/pixel)                  | 0.5315                             | 0.5315                  | 0.5315    | 0.5315                  | 0.536     | 0.5315                  | 0.5315                  |
| Number of movies                      | 4063                               | 4002                    | 5798      | 1791                    | 3304      | 8230                    | 1173                    |
| <b>Data processing</b>                |                                    |                         |           |                         |           |                         |                         |
| Number of particles refined           | 243K                               | 111K                    | 88K       | 57K                     | 116K      | 589K                    | 65K                     |
| Symmetry                              | C4                                 | C4                      | C4        | C4                      | C4        | C4                      | C4                      |
| Resolution (Å)                        | 2.7                                | 2.9                     | 3.4       | 2.9                     | 3.6       | 2.6                     | 3                       |
| sharpening B-factor (Å <sup>2</sup> ) | -36                                | -79                     | -114      | -85                     | -146      | -99                     | -83                     |
| FSC threshold                         | 0.143                              | 0.143                   | 0.143     | 0.143                   | 0.143     | 0.143                   | 0.143                   |
| Initial model (PDB ID)                | 5TJ6                               | 5TJ6                    | 5TJ6      | 5TJ6                    | 5TJI      | 5TJ6                    | 5TJ6                    |
| model resolution (Å)                  | 2.6                                | 2.6                     | 2.9       | 2.6                     | 3.5       | 3                       | 2.7                     |
| Model Composition                     |                                    |                         |           |                         |           |                         |                         |
| non-hydrogen atoms                    | 28433                              | 28220                   | 28207     | 28221                   | 28376     | 27861                   | 28418                   |
| Protein residues                      | 3620                               | 2596                    | 3596      | 3596                    | 3596      | 3560                    | 3596                    |
| Ligands                               | 5                                  | 17                      | 3         | 17                      | 0         | 17                      | 10                      |
| B factors(Å <sup>2</sup> )            |                                    |                         |           |                         |           |                         |                         |
| Proteins                              | 113.61                             | 114.15                  | 114.15    | 114.15                  | 62.81     | 221.89                  | 137.65                  |
| Ligands                               | 61.05                              | 91.85                   | 65.68     | 101.57                  | n/a       | 198.19                  | 121.29                  |
| R.M.S. deviations                     |                                    |                         |           |                         |           |                         |                         |
| Bond lengths (Å)                      | 0.012                              | 0.012                   | 0.011     | 0.011                   | 0.011     | 0.011                   | 0.014                   |
| Bond angles(°)                        | 1.813                              | 1.852                   | 1.763     | 1.814                   | 1.812     | 1.807                   | 1.826                   |
| Validation                            |                                    |                         |           |                         |           |                         |                         |
| Molprobity score                      | 1.26                               | 1.28                    | 1.21      | 1.13                    | 1.61      | 1.3                     | 1.7                     |
| Clashscore                            | 2.4                                | 2.95                    | 1.92      | 1.7                     | 4.58      | 3.73                    | 6.7                     |
| Poor rotamers (%)                     | 0.75                               | 0.93                    | 0.66      | 0.6                     | 0.82      | 0.41                    | 0.78                    |
| Ramachandran plot                     |                                    |                         |           |                         |           |                         |                         |
| Favored(%)                            | 96.42                              | 96.84                   | 96.25     | 96.73                   | 94.53     | 97.29                   | 95.29                   |
| Allowed(%)                            | 3.56                               | 3.16                    | 3.75      | 3.27                    | 5.38      | 2.71                    | 4.62                    |
| Disallowed(%)                         | 0.03                               | 0                       | 0         | 0                       | 0         | 0                       | 0.08                    |

**Supplementary Table 2.** Molecular dynamics simulation system setup

| System                          | WT apo<br>(PDB ID: 5tji)   | R3Q apo class1<br>(PDB ID: 9DKN) |
|---------------------------------|----------------------------|----------------------------------|
| Simulation box dimensions       | 100×100×105 Å <sup>3</sup> | 100×100×105 Å <sup>3</sup>       |
| Total number of atoms           | 96,181                     | 99,905                           |
| Total number of water molecules | 19,345                     | 20,495                           |
| Salt concentration              | 150 mM KCl                 | 150 mM KCl                       |
| Lipid type                      | POPC                       | POPC                             |
| Lipid number: outer leaflet     | 112                        | 114                              |
| Lipid number: inner leaflet     | 123                        | 123                              |



**Supplementary Table 3. Reliability and reproducibility checklist for molecular dynamics simulations.**

|                                                                                                                                                                                                                                                                                                                        | Yes                                 | No                                  | Response                                                                                                                                                                                             |
|------------------------------------------------------------------------------------------------------------------------------------------------------------------------------------------------------------------------------------------------------------------------------------------------------------------------|-------------------------------------|-------------------------------------|------------------------------------------------------------------------------------------------------------------------------------------------------------------------------------------------------|
| <b>1. Convergence of simulations and analysis</b>                                                                                                                                                                                                                                                                      |                                     |                                     |                                                                                                                                                                                                      |
| 1a. Is an evaluation presented in the text to show that the property being measured has equilibrated in the simulations (e.g. time-course analysis)?                                                                                                                                                                   | <input checked="" type="checkbox"/> | <input type="checkbox"/>            | Figure 3D and the subsection “ <i>System construction and molecular dynamics simulations</i> ”                                                                                                       |
| 1b. Then, is it described in the text how simulations are split into equilibration and production runs and how much data were analyzed from production runs?                                                                                                                                                           | <input checked="" type="checkbox"/> | <input type="checkbox"/>            | In the subsection “ <i>System construction and molecular dynamics simulations</i> ”                                                                                                                  |
| 1c. Are there at least 3 simulations per simulation condition with statistical analysis?                                                                                                                                                                                                                               | <input type="checkbox"/>            | <input checked="" type="checkbox"/> | We performed a histogram analysis of water number distribution in the cavity using snapshots from a long trajectory. Statistical information is included in the analysis for an equilibrated system. |
| 1d. Is evidence provided in the text that the simulation results presented are independent of initial configuration?                                                                                                                                                                                                   | <input checked="" type="checkbox"/> | <input type="checkbox"/>            | In the subsection “ <i>System construction and molecular dynamics simulations</i> ”                                                                                                                  |
| <b>2. Connection to experiments</b>                                                                                                                                                                                                                                                                                    |                                     |                                     |                                                                                                                                                                                                      |
| 2a. Are calculations provided that can connect to experiments (e.g. loss or gain in function from mutagenesis, binding assays, NMR chemical shifts, J-couplings, SAXS curves, interaction distances or FRET distances, structure factors, diffusion coefficients, bulk modulus and other mechanical properties, etc.)? | <input checked="" type="checkbox"/> | <input type="checkbox"/>            | Figure 3D and the subsection “ <i>The Resting VSD Structure Reveals a Deep Closed State of the Pore</i> ” of the main text                                                                           |
| <b>3. Method choice</b>                                                                                                                                                                                                                                                                                                |                                     |                                     |                                                                                                                                                                                                      |
| 3a. Do simulations contain membranes, membrane proteins, intrinsically disordered proteins, glycans, nucleic acids, polymers, or cryptic ligand binding?                                                                                                                                                               | <input checked="" type="checkbox"/> | <input type="checkbox"/>            | Response not needed if <b>No</b>                                                                                                                                                                     |
| 3b. Is it described in the text whether the accuracy of the chosen model(s) is sufficient to address the question(s) under investigation (e.g. all-atom vs. coarse-grained models, fixed charge vs. polarizable force fields, implicit vs. explicit solvent or membrane, force field and water model, etc.)?           | <input checked="" type="checkbox"/> | <input type="checkbox"/>            | In the subsection “ <i>System construction and molecular dynamics simulations</i> ”                                                                                                                  |
| 3c. Is the timescale of the event(s) under investigation beyond the brute-force MD simulation timescale in this study that enhanced sampling methods are needed?                                                                                                                                                       | <input type="checkbox"/>            | <input checked="" type="checkbox"/> |                                                                                                                                                                                                      |
| If <b>YES</b> , are the parameters and convergence criteria for the enhanced sampling method clearly stated?                                                                                                                                                                                                           | <input type="checkbox"/>            | <input type="checkbox"/>            |                                                                                                                                                                                                      |
| If <b>NO</b> , is the evidence provided in the text?                                                                                                                                                                                                                                                                   | <input checked="" type="checkbox"/> | <input type="checkbox"/>            | Figure 3D and the subsection “ <i>System construction and molecular dynamics simulations</i> ”                                                                                                       |

| <b>4. Code and reproducibility</b>                                                                                                                                                                                         |                                     |                                     |                                                                                      |
|----------------------------------------------------------------------------------------------------------------------------------------------------------------------------------------------------------------------------|-------------------------------------|-------------------------------------|--------------------------------------------------------------------------------------|
| 4a. Is a table provided describing the system setup that includes simulation box dimensions, total number of atoms, total number of water molecules, salt concentration, lipid composition (number of molecules and type)? | <input checked="" type="checkbox"/> | <input type="checkbox"/>            | Supplementary Table 2                                                                |
| 4b. Is it described in the text what simulation and analysis software and which versions are used?                                                                                                                         | <input checked="" type="checkbox"/> | <input type="checkbox"/>            | In the subsection<br><i>"System construction and molecular dynamics simulations"</i> |
| 4c. Are other parameters for the system setup described in the text, such as protonation state, type of structural restraints if applied, nonbonded cutoff, thermostat and barostat, etc.?                                 | <input checked="" type="checkbox"/> | <input type="checkbox"/>            | In the subsection<br><i>"System construction and molecular dynamics simulations"</i> |
| 4d. Are initial coordinate and simulation input files and a coordinate file of the final output provided as supplementary files or in a public repository?                                                                 | <input checked="" type="checkbox"/> | <input type="checkbox"/>            | Provided as supplementary files                                                      |
| 4e. Is there custom code or custom force field parameters?                                                                                                                                                                 | <input type="checkbox"/>            | <input checked="" type="checkbox"/> | Response not needed if<br><b>No</b>                                                  |
| <input type="checkbox"/> If <b>YES</b> , are they provided as supplementary files or in a public repository?                                                                                                               | <input type="checkbox"/>            | <input type="checkbox"/>            |                                                                                      |
